# Supplementary material for: Mapping the Key Technological and Functional Characteristics of Indigenous Lactic Acid Bacteria Isolated from Greek Traditional Dairy Products
Source: MDPI journal article supplement (doi:10.3390/microorganisms10020246), 2022-01-23
Supplement: s1 [file s1]

## Supplementary Tables

**Table S1.** Biochemical characteristics of the isolates retrieved from fresh white brined cheese.

| Isolates |                                      | Isolated medium/<br>Temperature °C | 10 °C | 42 °C | pH 4.4 | pH 9.6 | Anaerobic test | CO <sub>2</sub> | 6.5% NaCl | Haemolytic activity | Diacetyl Production | Lipolytic activity | Proteolytic Activity | EPS production |
|----------|--------------------------------------|------------------------------------|-------|-------|--------|--------|----------------|-----------------|-----------|---------------------|---------------------|--------------------|----------------------|----------------|
| FRX1     | <i>Leuconostoc mesenteroides</i>     | MRS/ 30 °C                         | +     | -     | +      | -      | +              | +               | -         | γ                   | -                   | -                  | +                    | -              |
| FRX2     | <i>Leuconostoc mesenteroides</i>     |                                    | +     | -     | +      | -      | +              | +               | +         | γ                   | -                   | -                  | +                    | -              |
| FRX3     | <i>Leuconostoc mesenteroides</i>     |                                    | +     | -     | +      | -      | +              | +               | +         | γ                   | -                   | -                  | +                    | -              |
| FRX4     | <i>Leuconostoc mesenteroides</i>     |                                    | +     | -     | +      | -      | +              | +               | +         | γ                   | -                   | -                  | +                    | -              |
| FRX5     | <i>Leuconostoc mesenteroides</i>     |                                    | +     | -     | +      | -      | +              | +               | +         | γ                   | -                   | -                  | +                    | -              |
| FRX6     | <i>Leuconostoc mesenteroides</i>     |                                    | +     | -     | +      | -      | +              | +               | -         | γ                   | -                   | -                  | +                    | -              |
| FRX7     | <i>Lactiplantibacillus plantarum</i> |                                    | +     | -     | +      | -      | +              | -               | +         | γ                   | -                   | -                  | +                    | -              |
| FRX8     | <i>Leuconostoc mesenteroides</i>     |                                    | +     | -     | +      | -      | +              | +               | +         | γ                   | -                   | -                  | +                    | -              |
| FRX9     | <i>Leuconostoc mesenteroides</i>     |                                    | +     | -     | +      | -      | +              | +               | +         | γ                   | -                   | -                  | +                    | -              |
| FRX10    | <i>Leuconostoc mesenteroides</i>     |                                    | +     | -     | +      | -      | +              | +               | +         | γ                   | -                   | -                  | +                    | -              |
| FRX11    | <i>Leuconostoc mesenteroides</i>     |                                    | +     | -     | +      | -      | +              | +               | +         | γ                   | -                   | -                  | +                    | -              |
| FRX12    | <i>Leuconostoc mesenteroides</i>     |                                    | +     | -     | +      | -      | +              | +               | +         | γ                   | -                   | -                  | -                    | -              |
| FRX13    | <i>Leuconostoc mesenteroides</i>     |                                    | +     | -     | -      | -      | +              | +               | +         | γ                   | -                   | -                  | -                    | -              |
| FRX14    | <i>Leuconostoc mesenteroides</i>     |                                    | +     | -     | -      | -      | +              | +               | -         | γ                   | -                   | -                  | -                    | -              |
| FRX15    | <i>Leuconostoc mesenteroides</i>     |                                    | +     | -     | +      | -      | +              | +               | +         | γ                   | -                   | -                  | -                    | -              |
| FRX16    | <i>Leuconostoc mesenteroides</i>     |                                    | +     | -     | +      | -      | +              | +               | +         | γ                   | -                   | -                  | -                    | -              |
| FRX17    | <i>Lactiplantibacillus plantarum</i> |                                    | +     | -     | +      | -      | +              | -               | +         | γ                   | -                   | -                  | -                    | -              |
| FRX18    | <i>Leuconostoc mesenteroides</i>     |                                    | +     | -     | +      | -      | +              | -               | +         | γ                   | -                   | -                  | -                    | -              |
| FRX19    | <i>Leuconostoc mesenteroides</i>     |                                    | +     | -     | +      | -      | +              | +               | -         | γ                   | -                   | -                  | -                    | -              |
| FRX20    | <i>Lactiplantibacillus plantarum</i> |                                    | +     | -     | +      | -      | +              | -               | +         | γ                   | -                   | -                  | -                    | -              |
| FRM1     | putative enterococci                 | MRS/ 42 °C                         | +     | +     | +      | +      | +              | -               | +         | γ                   | -                   | -                  | -                    | +              |
| FRM4     | putative enterococci                 |                                    | +     | +     | +      | +      | +              | -               | +         | γ                   | -                   | -                  | -                    | +              |
| FRM5     | putative enterococci                 |                                    | +     | +     | +      | +      | +              | -               | +         | γ                   | -                   | -                  | +                    | +              |

|       |                                      |            |   |   |   |   |   |   |   |   |   |   |   |   |
|-------|--------------------------------------|------------|---|---|---|---|---|---|---|---|---|---|---|---|
| FRM7  | putative enterococci                 |            | + | + | + | + | + | - | + | γ | - | - | - | - |
| FRM15 | putative enterococci                 |            | + | + | + | + | + | - | + | - | - | - | - | + |
| FMX1  | <i>Leuconostoc mesenteroides</i>     | M17/ 37 °C | + | - | - | - | + | + | - | γ | - | - | + | - |
| FMX2  | putative enterococci                 |            | + | + | + | + | + | + | + | - | - | - | + | - |
| FMX3  | <i>Leuconostoc mesenteroides</i>     |            | + | + | + | - | + | - | + | γ | - | - | + | - |
| FMX4  | putative enterococci                 |            | + | + | + | + | + | - | + | γ | - | - | + | - |
| FMX5  | putative enterococci                 |            | + | + | + | + | + | + | + | γ | - | - | - | - |
| FMX6  | <i>Leuconostoc mesenteroides</i>     |            | + | - | + | - | + | + | - | - | - | - | + | - |
| FMX8  | putative enterococci                 |            | + | + | + | + | + | + | + | γ | - | - | - | - |
| FMX9  | putative enterococci                 |            | + | + | + | + | + | - | + | - | - | - | - | - |
| FMX10 | putative enterococci                 |            | + | + | + | + | + | + | + | γ | - | - | - | - |
| FMX11 | <i>Leuconostoc mesenteroides</i>     |            | + | - | + | - | + | + | - | - | - | - | - | - |
| FMX12 | <i>Leuconostoc mesenteroides</i>     |            | + | + | + | - | + | + | - | γ | - | - | + | - |
| FMX14 | <i>Leuconostoc mesenteroides</i>     |            | + | - | + | - | + | - | - | γ | - | - | + | - |
| FMM2  | putative enterococci                 | M17/ 42 °C | + | + | - | + | + | - | + | γ | - | - | - | - |
| FMM3  | <i>Enterococcus faecium</i>          |            | + | + | - | + | + | - | + | γ | - | - | + | - |
| FMM4  | putative enterococci                 |            | + | + | - | + | + | - | + | γ | - | - | - | - |
| FMM5  | putative enterococci                 |            | + | + | - | + | + | - | + | γ | - | - | + | - |
| FMM6  | putative enterococci                 |            | + | + | - | + | + | - | + | γ | - | - | + | - |
| FMM7  | putative enterococci                 |            | + | + | - | + | + | - | + | γ | - | - | - | - |
| FMM8  | putative enterococci                 |            | + | + | - | + | + | - | + | γ | - | - | + | - |
| FMM9  | putative enterococci                 |            | + | + | - | + | + | - | + | γ | - | - | - | - |
| FMM10 | putative enterococci                 |            | + | + | - | + | + | - | + | γ | - | - | + | + |
| FMM12 | putative enterococci                 |            | + | + | - | + | + | - | + | γ | - | - | + | + |
| FMM13 | putative enterococci                 |            | + | + | - | + | + | - | + | γ | - | - | + | - |
| FMM15 | putative enterococci                 |            | + | + | - | + | + | - | + | γ | - | - | + | + |
| FB1   | <i>Lactiplantibacillus plantarum</i> | M17/ 37 °C | + | + | + | - | + | - | + | γ | - | - | - | - |
| FB2   | <i>Enterococcus</i> spp.             |            | + | + | + | + | + | - | + | γ | - | - | + | + |
| FB3   | putative enterococci                 |            | + | + | + | + | + | - | + | γ | - | - | + | - |
| FB4   | putative enterococci                 |            | + | + | + | + | + | - | + | γ | - | - | - | - |

|      |                                      |  |   |   |   |   |   |   |   |          |   |   |   |   |
|------|--------------------------------------|--|---|---|---|---|---|---|---|----------|---|---|---|---|
| FB5  | putative enterococci                 |  | + | + | + | + | + | - | + | $\gamma$ | - | - | - | - |
| FB6  | putative enterococci                 |  | + | + | + | + | + | - | + | $\gamma$ | - | - | + | - |
| FB7  | putative enterococci                 |  | + | + | - | + | + | - | + | $\gamma$ | - | - | + | - |
| FB9  | putative enterococci                 |  | + | + | + | + | + | - | + | $\gamma$ | - | - | + | - |
| FB10 | putative enterococci                 |  | + | + | + | + | + | - | + | $\gamma$ | - | - | + | - |
| FB11 | <i>Enterococcus faecium</i>          |  | + | + | + | + | + | - | + | $\gamma$ | - | - | + | - |
| FB12 | putative enterococci                 |  | + | + | + | + | + | - | + | $\gamma$ | - | - | + | - |
| FB13 | putative enterococci                 |  | + | + | + | + | + | - | + | $\gamma$ | - | - | - | - |
| FB14 | putative enterococci                 |  | + | + | + | + | + | - | + | $\gamma$ | - | - | - | - |
| FB15 | <i>Enterococcus faecium</i>          |  | + | + | + | + | + | - | + | $\gamma$ | - | - | + | - |
| FB17 | <i>Lactiplantibacillus plantarum</i> |  | + | + | + | - | + | - | + | $\gamma$ | - | - | + | - |

**Table S2.** Biochemical characteristics of the isolates retrieved from fresh semi hard goat cheese.

| Isolates |                                        | Isolated medium/<br>Temperature °C | 10 °C | 42 °C | pH 4.4 | pH 9.6 | Anaerobic test | CO <sub>2</sub> | 6.5% NaCl | Haemolytic activity | Diacetyl Production | Lipolytic activity | Proteolytic Activity | EPS production |
|----------|----------------------------------------|------------------------------------|-------|-------|--------|--------|----------------|-----------------|-----------|---------------------|---------------------|--------------------|----------------------|----------------|
| SRX1     | <i>Leuconostoc pseudomesenteroides</i> | MRS/ 30 °C                         | +     | -     | +      | -      | +              | +               | -         | $\gamma$            | -                   | -                  | -                    | +              |
| SRX2     | <i>Lactococcus lactis</i>              |                                    | +     | -     | +      | -      | +              | -               | -         | -                   | -                   | -                  | -                    | +              |
| SRX3     | <i>Lactococcus lactis</i>              |                                    | +     | -     | +      | -      | +              | -               | -         | -                   | -                   | -                  | +                    | +              |
| SRX4     | <i>Lactococcus lactis</i>              |                                    | +     | -     | -      | -      | +              | -               | -         | $\gamma$            | -                   | -                  | +                    | -              |
| SRX5     | <i>Lactococcus lactis</i>              |                                    | +     | -     | -      | -      | +              | -               | -         | -                   | -                   | -                  | -                    | +              |
| SRX6     | <i>Leuconostoc mesenteroides</i>       |                                    | +     | -     | +      | -      | +              | +               | -         | $\gamma$            | -                   | -                  | -                    | -              |
| SRX7     | <i>Leuconostoc pseudomesenteroides</i> |                                    | +     | -     | +      | -      | +              | +               | -         | $\gamma$            | -                   | -                  | -                    | -              |
| SRX8     | <i>Leuconostoc</i> spp.                |                                    | +     | -     | +      | -      | +              | +               | -         | $\gamma$            | -                   | -                  | -                    | -              |
| SRX9     | <i>Leuconostoc mesenteroides</i>       |                                    | +     | -     | +      | -      | +              | -               | +         | $\gamma$            | -                   | -                  | -                    | -              |
| SRX10    | <i>Lactocaseibacillus paracasei</i>    |                                    | +     | -     | +      | -      | +              | -               | -         | $\gamma$            | -                   | -                  | -                    | -              |
| SRX11    | putative enterococci                   |                                    | +     | +     | -      | +      | +              | -               | +         | $\gamma$            | -                   | -                  | -                    | -              |

|       |                                        |            |   |   |   |   |   |   |   |   |   |   |   |   |
|-------|----------------------------------------|------------|---|---|---|---|---|---|---|---|---|---|---|---|
| SRX12 | putative enterococci                   |            | + | + | - | + | + | - | + | - | - | - | - | - |
| SRX13 | putative enterococci                   |            | + | + | - | + | + | - | + | γ | - | - | - | - |
| SRX14 | <i>Lactococcus lactis</i>              |            | + | - | - | - | + | - | - | - | - | - | - | - |
| SRX16 | <i>Leuconostoc pseudomesenteroides</i> |            | + | - | - | - | + | + | - | γ | - | - | - | - |
| SRX17 | <i>Lactococcus lactis</i>              |            | + | - | - | - | + | - | - | γ | - | - | - | - |
| SRX18 | <i>Leuconostoc pseudomesenteroides</i> |            | + | - | + | - | + | + | - | γ | - | - | - | - |
| SRX19 | <i>Levilactobacillus brevis</i>        |            | + | + | + | - | + | + | - | γ | - | - | - | - |
| SRX20 | <i>Levilactobacillus brevis</i>        |            | + | + | + | - | + | + | - | γ | - | - | - | - |
| SMX2  | <i>Lactococcus lactis</i>              | M17/ 37 °C | + | + | + | - | + | - | - | γ | - | - | + | - |
| SMX3  | putative enterococci                   |            | + | + | + | + | + | - | + | γ | - | - | + | - |
| SMX4  | <i>Enterococcus faecium</i>            |            | + | + | + | + | + | - | + | γ | - | - | + | - |
| SMX5  | <i>Lactococcus lactis</i>              |            | + | + | + | - | + | - | - | γ | - | - | + | - |
| SMX6  | putative enterococci                   |            | + | + | + | + | + | - | + | γ | - | - | + | - |
| SMX8  | putative enterococci                   |            | + | + | + | + | + | - | + | γ | - | - | + | - |
| SMX13 | putative enterococci                   |            | + | + | + | + | + | - | + | γ | - | - | + | - |
| SMX14 | putative enterococci                   |            | + | + | + | + | + | - | + | γ | - | - | + | - |
| SMX15 | putative enterococci                   |            | + | + | + | + | + | - | + | γ | - | - | + | - |
| SMX16 | <i>Lactococcus lactis</i>              |            | + | + | + | - | + | - | - | γ | - | - | + | + |
| SMX17 | putative enterococci                   |            | + | + | + | + | + | - | + | γ | - | - | + | + |
| SMX18 | putative enterococci                   |            | + | + | + | + | + | - | + | γ | - | - | + | + |
| SMX19 | putative enterococci                   |            | + | + | + | + | + | - | + | γ | - | - | + | + |
| SMX20 | <i>Lactococcus lactis</i>              |            | + | + | + | - | + | - | - | γ | - | - | + | + |
| SRM1  | putative enterococci                   | MRS/ 42 °C | + | + | + | + | + | - | + | γ | - | - | + | + |
| SRM3  | putative enterococci                   |            | + | + | + | + | + | - | + | γ | - | - | + | + |
| SB1   | putative enterococci                   | M17/ 37 °C | + | + | + | + | + | - | + | γ | - | - | + | - |
| SB2   | putative enterococci                   |            | + | + | + | + | + | - | + | γ | - | - | + | - |
| SB3   | putative enterococci                   |            | + | + | + | + | + | - | + | γ | - | - | + | - |
| SB4   | putative enterococci                   |            | + | + | + | + | + | - | + | - | - | - | + | - |
| SB5   | putative enterococci                   |            | + | + | + | + | + | - | + | γ | - | - | + | - |

|      |                            |  |   |   |   |   |   |   |   |          |   |   |   |   |
|------|----------------------------|--|---|---|---|---|---|---|---|----------|---|---|---|---|
| SB6  | putative enterococci       |  | + | + | + | + | + | - | + | $\gamma$ | - | - | + | - |
| SB7  | putative enterococci       |  | + | + | + | + | + | - | + | $\gamma$ | - | - | + | - |
| SB8  | <i>Enterococcus lactis</i> |  | + | + | + | + | + | - | + | $\gamma$ | - | - | + | - |
| SB9  | putative enterococci       |  | + | + | + | + | + | - | + | $\gamma$ | - | - | + | - |
| SB10 | putative enterococci       |  | + | + | + | + | + | - | + | $\gamma$ | - | - | + | - |

### Supplementary Figure

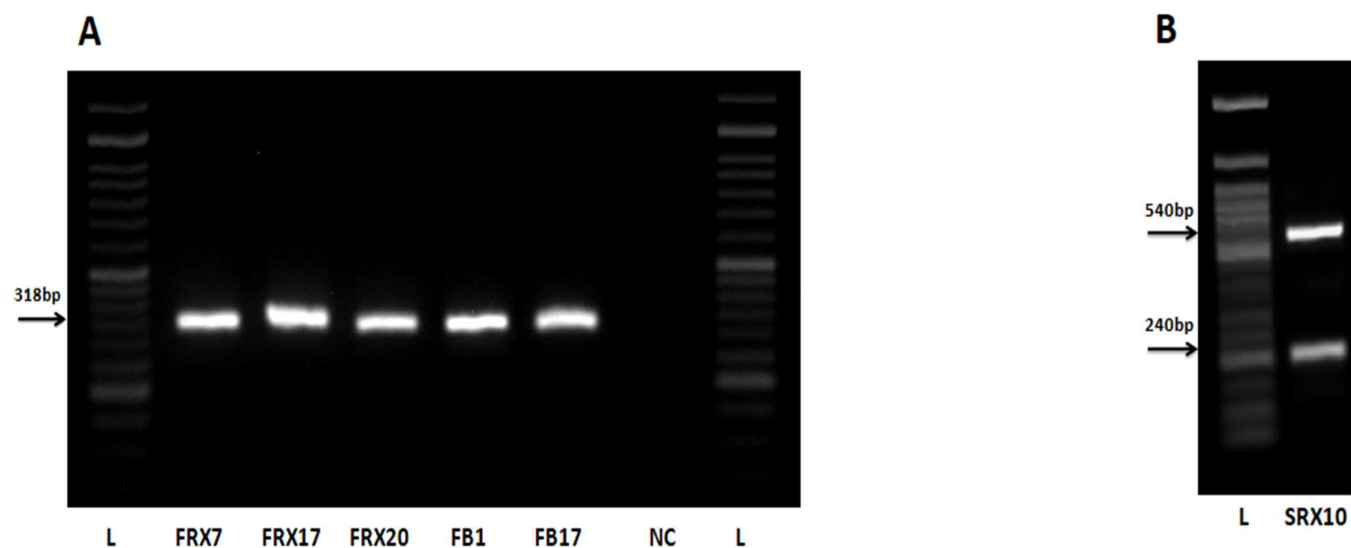

**Figure S1.** (A) PCR products of *Lactiplantibacillus plantarum* FRX7, FRX17, FRX20, FB1 and FB17 isolates obtained from the *recA* gene assay. The arrow indicates the band of 318bp. L: 50bp DNA ladder (New England, BioLabs); NC: negative control. (B) PCR products of *Lacticaseibacillus paracasei* SRX10 isolate obtained from *tuf* gene assay. The arrows indicate the band of 540bp and 240bp. L: 50bp DNA ladder (New England, BioLabs)
